# Supplementary material
Source: PubMed Central journal article supplement (PMC5710543)

## Supplementary Online Content

Saldanha JJ, Lindsley K, Do DV, et al. Comparison of clinical trial and systematic review outcomes for the 4 most prevalent eye diseases. *JAMA Ophthalmol*. Published online August 3, 2017. doi:10.1001/jamaophthalmol.2017.2583

**eFigure.** Selection of Reviews and Trials for This Study

This supplementary material has been provided by the authors to give readers additional information about their work.

eFigure 1 Selection of reviews and trials for this study

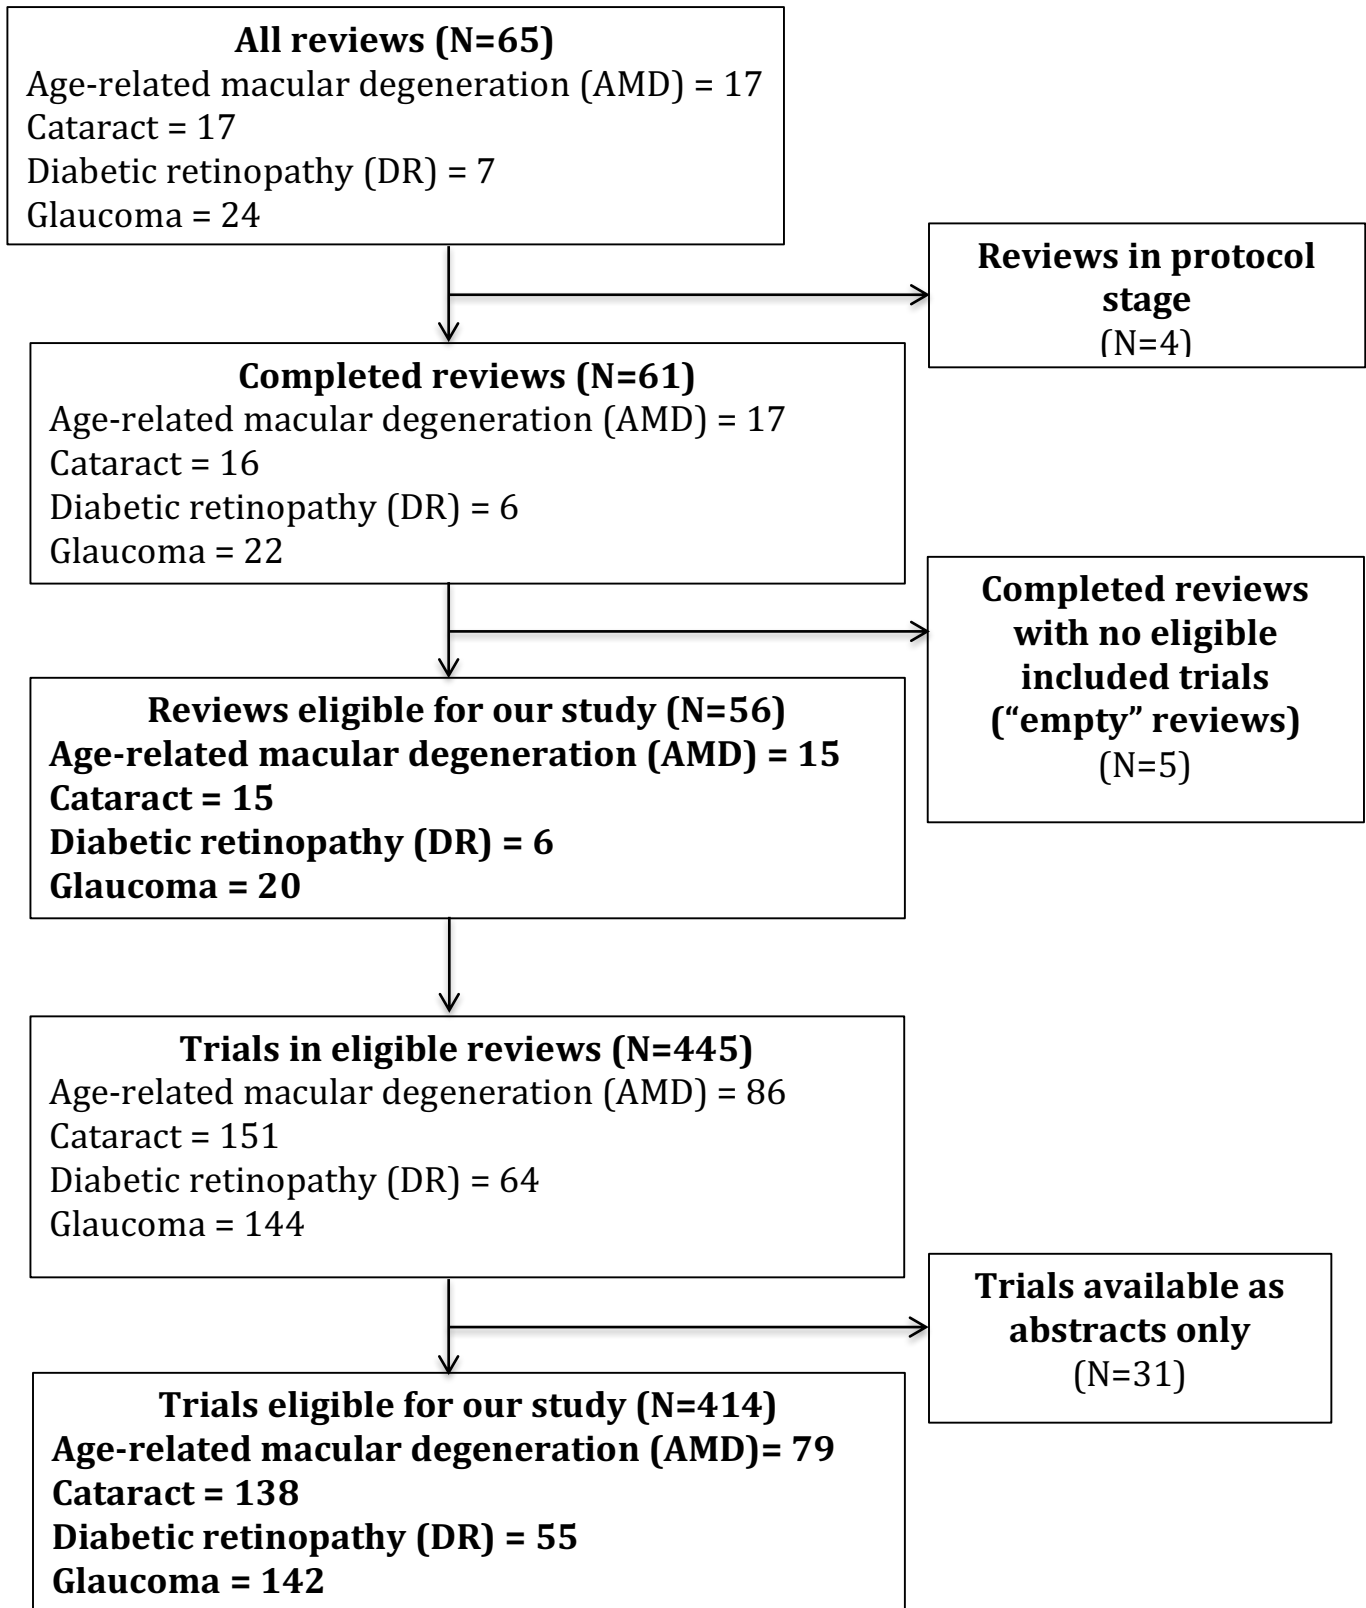

Supplement: jamaophthalmol-135-933-s001.pdf [file jamaophthalmol-135-933-s001.pdf]
